# Supplementary material for: A new immunodeficient Duchenne muscular dystrophy rat model to evaluate engraftment after human cell transplantation
Source: PubMed Central journal article supplement (PMC10123282; doi:10.3389/fphys.2023.1094359), 2023-04-10
Supplement: DataSheet1.pdf [file DataSheet1.pdf]

# Supplementary Table S1

| <b>1st antibody</b>              | <b>Sourse</b> | <b>Clonarity</b> | <b>Dilution</b> | <b>Company</b>           |
|----------------------------------|---------------|------------------|-----------------|--------------------------|
| Anti-Dystrophin antibody         | rabbit poly   | IgG              | 1:100 or 1:200  | Abcam                    |
| Anti-h-Spectrin antibody         | mouse mono    | IgG2b            | 1:100           | Leica                    |
| Anti-h-Nuclei antibody           | mouse mono    | IgG1             | 1:500           | Merck                    |
| Anti-Lamin A/C antibody          | mouse mono    | IgG2b            | 1:200           | Santacruts               |
| Anti-Laminin $\alpha$ 2 antibody | rat mono      | IgG1             | 1:50            | ALEXIS                   |
| <b>2nd antibody</b>              | <b>Sourse</b> | <b>Clonarity</b> | <b>Dilution</b> | <b>Company</b>           |
| Anti-Rabbit antibody 488         |               |                  | 1:500           | Thermo Fisher Scientific |
| Anti-Rabbit antibody 568         |               |                  | 1:500           | Thermo Fisher Scientific |
| Anti-mouse IgG1 antibody 568     |               |                  | 1:500           | Thermo Fisher Scientific |
| Anti-mouse IgG1 antibody 647     |               |                  | 1:500           | Thermo Fisher Scientific |
| Anti-mouse IgG2b antibody 488    |               |                  | 1:500           | Thermo Fisher Scientific |
| Anti-mouse IgG2b antibody 568    |               |                  | 1:500           | Thermo Fisher Scientific |
| Anti-Rat antibody 647            |               |                  | 1:500           | Abcam                    |
| Anti-mouse IgG1 antibody HRP     |               |                  | 1:500           | Abcam                    |

Supplemental Table S1. List of antibodies used in the study and their respective dilutions.

# Supplementary Figure S1

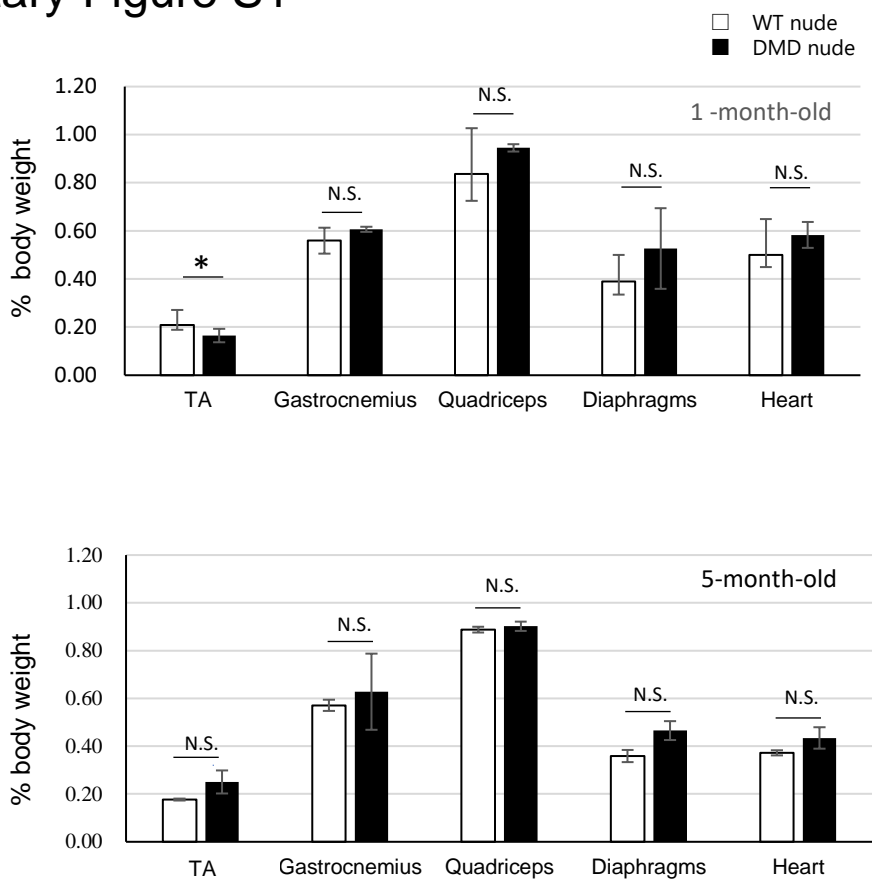

Supplementary Figure S1. Analysis of skeletal muscle to body weight ratio in Duchenne Muscular Dystrophy (DMD) and wild type (WT) nude rats at 1 and 5-month-old.

# Supplementary Figure S2

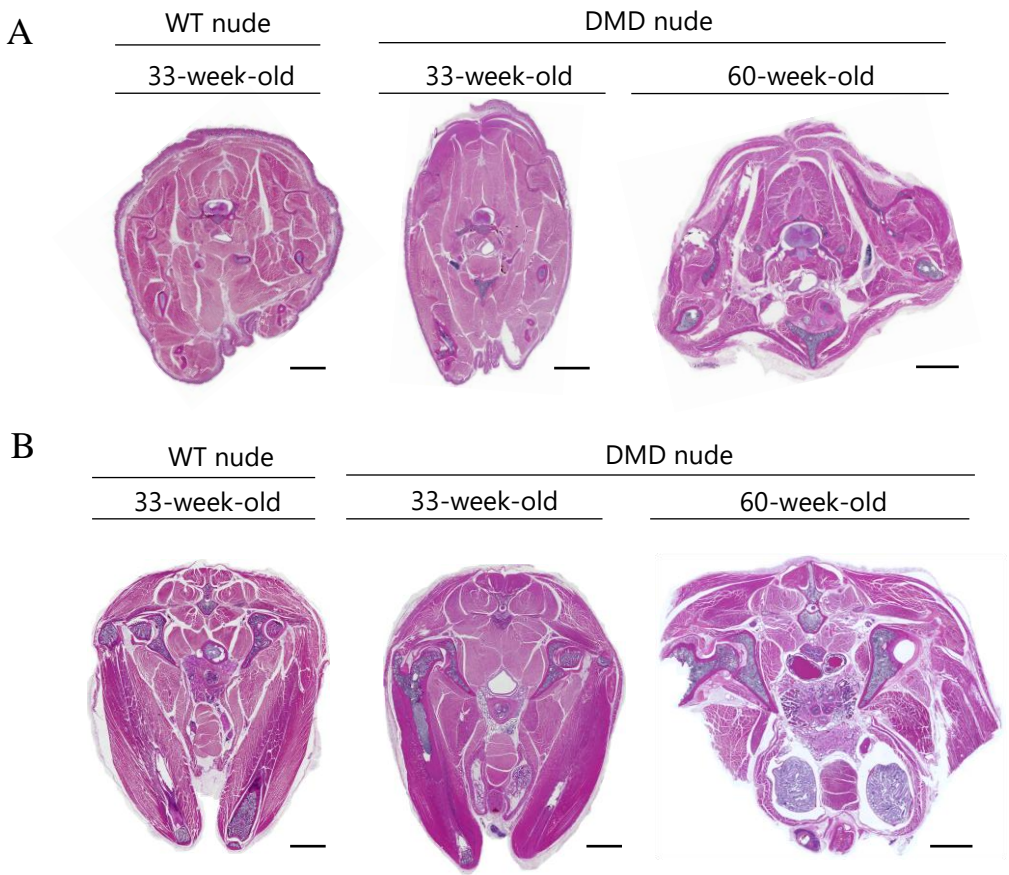

Supplementary Figure S2. Hematoxylin & eosin (H&E) staining images in the Th1 and S2 region of wild type (WT) nude rats and Duchenne Muscular Dystrophy (DMD) nude rat. A shows an overall view of a section cut at position Th1. Scale bar = 5mm. B shows an overall view of a section cut at position S2. Scale bar = 300 $\mu$ m.

# Supplementary Figure S3

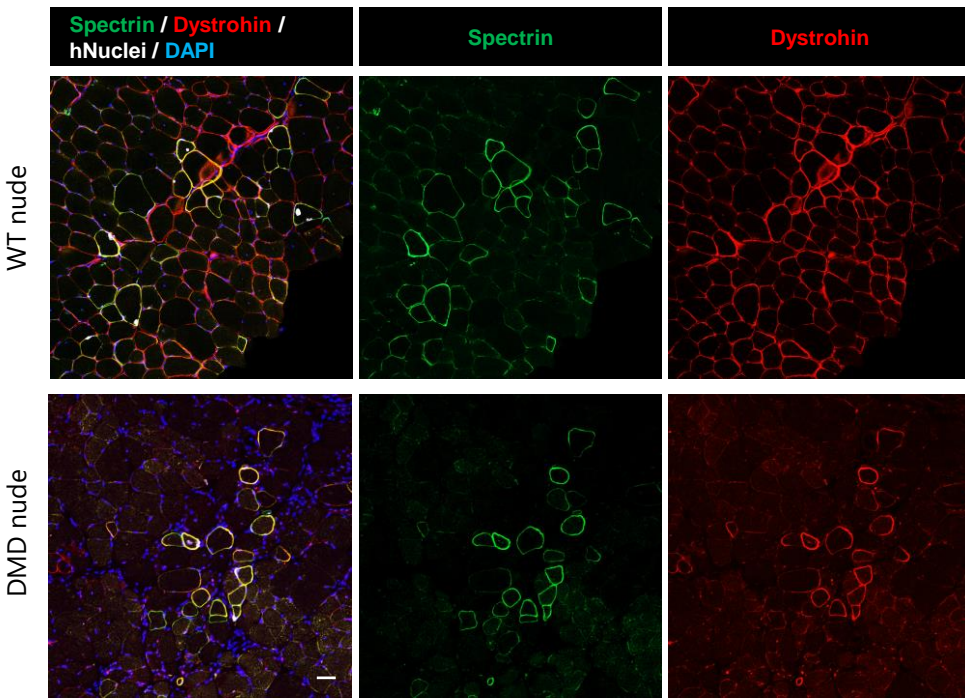

Supplementary Figure S3. Confirmation of long-term (3 months) engraftment of human cells in wild type (WT) nude rats and Duchenne Muscular Dystrophy (DMD) nude rat. Scale bar = 25  $\mu$ m.

# Supplementary Figure S4

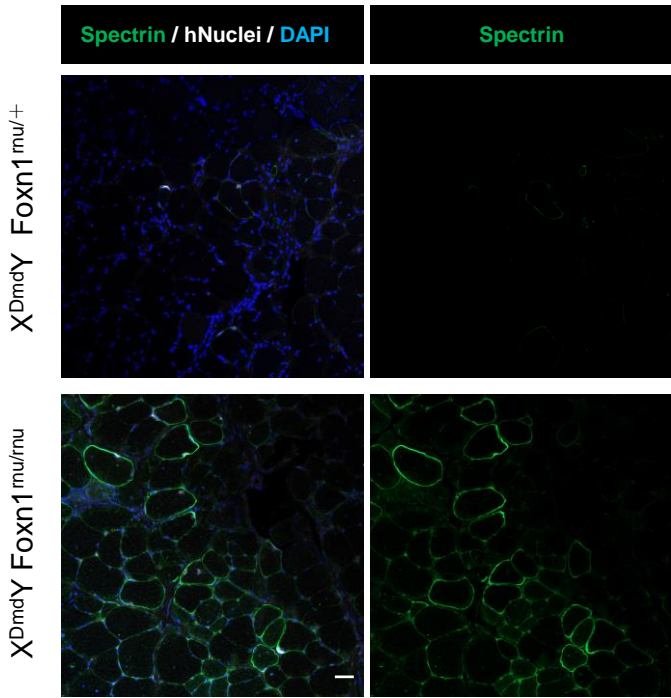

Supplementary Figure S4. Comparison of human cell engraftment between immunocompetent (Foxn1<sup>mu/+</sup>) and immunodeficient (Foxn1<sup>mu/mu</sup>) DMD model rats. Scale bar = 25  $\mu$ m.
